# Supplementary material for: CD276-Positive Circulating Endothelial Cells Do Not Predict Response to Systemic Therapy in Advanced Colorectal Cancer
Source: PubMed Central journal article supplement (PMC7016770; doi:10.3390/cells9010124), 2020-01-05
Supplement: cells-09-00124-s001.pdf [file cells-09-00124-s001.pdf]

Supplementary Table

Table S1. Baseline Characteristics of patients

| Parameter                       | N(%)     | Median CEC (IQR <sup>1</sup> ) | P value (Mann<br>Whitney U) | MeanCD276+CEC<br>(median; IQR <sup>1</sup> ) | p value<br>(Man<br>Whitney) |
|---------------------------------|----------|--------------------------------|-----------------------------|----------------------------------------------|-----------------------------|
| Gender                          |          |                                | 0.96                        |                                              | 0.84                        |
| Male                            | 118 (66) | 48 (59)                        |                             | 17 (35)                                      |                             |
| Female                          | 61 (34)  | 50 (70)                        |                             | 19 (48)                                      |                             |
| Age                             |          |                                | 0.97                        |                                              | 0.75                        |
| <65                             | 97 (54)  | 52 (66)                        |                             | 20 (45)                                      |                             |
| ≥65                             | 82 (46)  | 47.5 (69)                      |                             | 15 (31)                                      |                             |
| Chronicity                      |          |                                | 0.92                        |                                              | 0.57                        |
| Synchronous                     | 108 (60) | 46.5 (78)                      |                             | 17.5 (31)                                    |                             |
| Metachronous                    | 72 (40)  | 51 (51)                        |                             | 17.5 (40)                                    |                             |
| Sidedness of<br>primary tumour  |          |                                | 0.86                        |                                              | 0.71                        |
| Left                            | 129 (70) | 48 (62)                        |                             | 17 (29)                                      |                             |
| Right                           | 52 (30)  | 53.5 (69)                      |                             | 21 (51)                                      |                             |
| Tumour location                 |          |                                | 0.87                        |                                              | 0.55                        |
| Colon                           | 101 (56) | 53 (75)                        |                             | 20 (49)                                      |                             |
| Rectum                          | 80 (44)  | 47.5 (54)                      |                             | 17.5 (24)                                    |                             |
| Primary in situ                 |          |                                | 0.94                        |                                              | 0.71                        |
| Yes                             | 66 (36)  | 49 (66)                        |                             | 21.5 (35)                                    |                             |
| No                              | 116 (64) | 48.5 (64)                      |                             | 16 (41)                                      |                             |
| Number of<br>metastases         |          |                                | 0.78                        |                                              | 0.75                        |
| <5                              | 39 (22)  | 56 (64)                        |                             | 22 (53)                                      |                             |
| 5-10                            | 88 (49)  | 47.5 (67)                      |                             | 18 (40)                                      |                             |
| >10 or diffuse                  | 51 (29)  | 48 (71)                        |                             | 14 (35)                                      |                             |
| Number of organs<br>involved    |          |                                | 0.58                        |                                              | 0.44                        |
| 2                               | 107 (59) | 52 (77)                        |                             | 21 (44)                                      |                             |
| >2                              | 75 (41)  | 48 (54)                        |                             | 14 (24)                                      |                             |
| CEA ug/l                        |          |                                | 0.90                        |                                              | 0.67                        |
| >5                              | 135 (78) | 50 (67)                        |                             | 18 (36)                                      |                             |
| <5                              | 38 (22)  | 44 (55)                        |                             | 17 (37)                                      |                             |
| Chemotherapy <sup>2</sup>       |          |                                | 0.23                        |                                              | 0.44                        |
| CAPOX                           | 171 (94) | 50 (68)                        |                             | 19 (42)                                      |                             |
| FOLFOX                          | 10 (6)   | 33.5 (28)                      |                             | 12.5 (13)                                    |                             |
| Bevacizumab                     |          |                                |                             |                                              |                             |
| Yes                             | 138 (76) | 49.5 (68)                      | 0.90                        | 18 (35)                                      | 0.82                        |
| No                              | 43 (24)  | 45 (53)                        |                             | 14 (42)                                      |                             |
| Prior (neo)<br>adjuvant chemo   |          |                                | 0.44                        |                                              | 0.23                        |
| Yes                             | 34 (19)  | 44 (52)                        |                             | 13 (26)                                      |                             |
| No                              | 147 (81) | 50 (68)                        |                             | 18 (41)                                      |                             |
| Prior<br>chemoradiation         |          |                                | 0.41                        |                                              | 0.55                        |
| Yes                             | 31       | 55 (50)                        |                             | 25 (21)                                      |                             |
| No                              | 150      | 46.5 (70)                      |                             | 17.5 (45)                                    |                             |
| Response at first<br>evaluation |          |                                | 0.41                        |                                              | 0.81                        |

|                          |                     |          |          |      |           |      |
|--------------------------|---------------------|----------|----------|------|-----------|------|
|                          | PD <sup>3</sup>     | 11       | 35 (192) | 0.41 | 13 (79)   | 0.81 |
|                          | Non PD <sup>3</sup> | 158      | 48 (66)  |      | 17.5 (35) |      |
| LDH                      |                     |          |          | 0.50 |           | 0.38 |
|                          | Normal              | 144 (81) | 48 (69)  |      | 18 (35)   |      |
|                          | Abnormal            | 33 (19)  | 50 (50)  |      | 14 (36)   |      |
| Previous local treatment |                     |          |          | 0.45 |           | 0.29 |
|                          | Yes                 | 59 (33)  | 50 (81)  |      | 23 (44)   |      |
|                          | No                  | 121 (67) | 48 (58)  |      | 17 (35)   |      |
| ECOG PS <sup>4</sup>     |                     |          |          | 0.55 |           | 0.39 |
|                          | 0                   | 115 (73) | 48 (58)  |      | 18 (33)   |      |
|                          | 1                   | 43 (27)  | 48 (70)  |      | 22 (42)   |      |

<sup>1</sup>IQR = Interquartile range

<sup>2</sup>CAPOX = combination chemotherapy with capecitabine and oxaliplatin. FOLFOX = combination chemotherapy infusional 5-FU/Leucovorin and oxaliplatin.

<sup>3</sup>PD = progressive disease

<sup>4</sup> Eastern Cooperative Oncology Group Performance Scale
